# Supplementary material
Source: Springer Nature journal article supplement (https://www.springermedizin.de/resource/supplementary/12885_2009_2570_MOESM11_ESM.pdf/9462584)
Supplement: MOESM11 [file 9462584]

SC AC

- SCK
- JCK
- Cho-CK
- Choi-CK

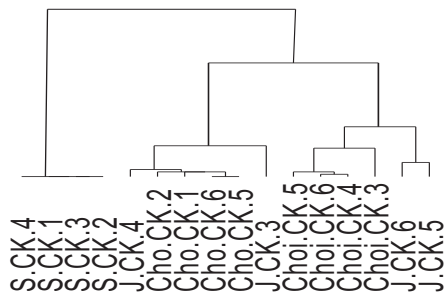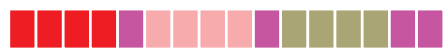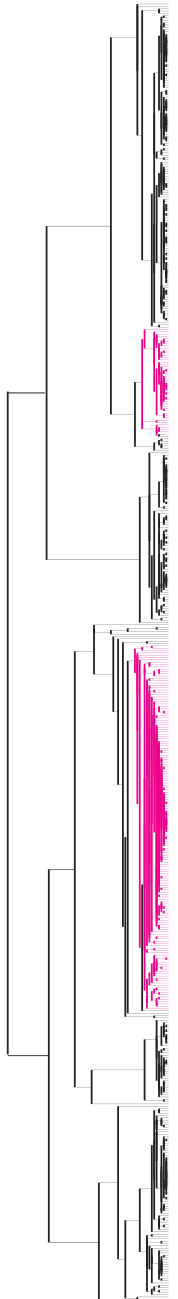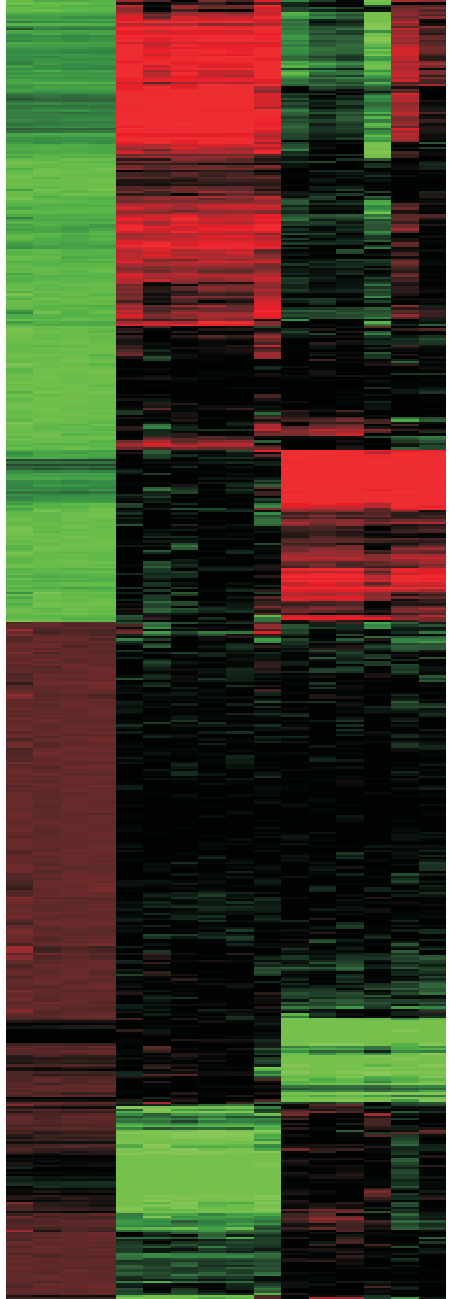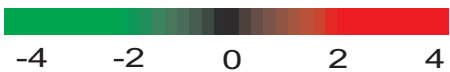

*GSTT1*  
*MAPK13*  
*METRNL*  
*FAM84B*  
*TACSTD1*  
*BST2*  
*RAB25*  
*KRTCAP3*  
*MAL2*  
*TRPV4*  
*OVOL2*  
*TNFRSF11B*

*PRG1*  
*CDH17*  
*CT45-5*  
*C2ORF32*  
*OSTBETA*  
*BNIP3*  
*GAGE6*  
*GAGE8*  
*CT45-3*  
*GAGE5*  
*LOC645037*  
*LDHB*  
*GYPC*  
*CT45-4*  
*C4ORF18*  
*FAM5C*  
*GAGE2*  
*GAGE4*  
*NPTX2*  
*CSAG1*  
*HOXA9*  
*GAGE1*  
*GAGE7B*  
*PTHR2*  
*CP*  
*CT45-1*  
*KIAA1862*  
*PCDH17*  
*ABCC2*  
*HSU79303*  
*ADH1C*  
*ADH1A*  
*MUC13*  
*TM4SF20*
